# Supplementary material
Source: publisher figshare collection journal article supplement (https://gsapubs.figshare.com/articles/dataset/_/19400963)
Supplement: Supplementary file 1 [file 1]

Supplemental Table 1. Paleocurrent measurements and locations (Abbreviations: trough cross bedding (TCB), planar cross bedding (PCB))

Abbreviations: trough cross bedding (TCB), planar cross bedding (PCB).

| <u>Measurement</u> | <u>Sed Structure</u> | <u>Latitude</u> | <u>Longitude</u> | <u>Formation</u> | <u>General Area</u> |
|--------------------|----------------------|-----------------|------------------|------------------|---------------------|
| 340°               | Small Scale TCB      | 44.74004°N      | 109.13447°W      | Willwood Fm      | North               |
| 15°                | Small Scale TCB      | 44.74004°N      | 109.13447°W      | Willwood Fm      | North               |
| 250°               | Small Scale TCB      | 44.74004°N      | 109.13447°W      | Willwood Fm      | North               |
| 35°                | Small Scale TCB      | 44.74004°N      | 109.13447°W      | Willwood Fm      | North               |
| 85°                | Small Scale TCB      | 44.74004°N      | 109.13447°W      | Willwood Fm      | North               |
| 190°               | Small Scale TCB      | 44.74004°N      | 109.13447°W      | Willwood Fm      | North               |
| 110°               | Small Scale TCB      | 44.74004°N      | 109.13447°W      | Willwood Fm      | North               |
| 165°               | Small Scale TCB      | 44.74004°N      | 109.13447°W      | Willwood Fm      | North               |
| 160°               | Small Scale TCB      | 44.74004°N      | 109.13447°W      | Willwood Fm      | North               |
| 330°               | Large Scale TCB      | 44.74004°N      | 109.13447°W      | Willwood Fm      | North               |
| 105°               | Large Scale TCB      | 44°44'19"N      | 109°7'44"W       | Willwood Fm      | North               |
| 15°                | Large Scale TCB      | 44°44'19"N      | 109°7'44"W       | Willwood Fm      | North               |
| 95°                | Large Scale TCB      | 44°44'19"N      | 109°7'44"W       | Willwood Fm      | North               |
| 295°               | Small Scale TCB      | 44°44'19"N      | 109°7'44"W       | Willwood Fm      | North               |
| 395°               | Small Scale TCB      | 44°44'19"N      | 109°7'44"W       | Willwood Fm      | North               |
| 290°               | Small Scale TCB      | 44°44'19"N      | 109°7'44"W       | Willwood Fm      | North               |
| 285°               | Large Scale TCB      | 44°47'9"N       | 109°6'39"W       | Willwood Fm      | North               |
| 310°               | Small Scale TCB      | 44°47'9"N       | 109°6'39"W       | Willwood Fm      | North               |
| 244°               | Large Scale TCB      | 44°47'9"N       | 109°6'39"W       | Willwood Fm      | North               |
| 165°               | Large Scale TCB      | 44°47'14"N      | 109°6'25"W       | Willwood Fm      | North               |
| 117°               | Large Scale TCB      | 44°47'14"N      | 109°6'25"W       | Willwood Fm      | North               |
| 177°               | Large Scale TCB      | 44°47'14"N      | 109°6'25"W       | Willwood Fm      | North               |
| 133°               | Large Scale TCB      | 44°47'14"N      | 109°6'25"W       | Willwood Fm      | North               |
| 320°               | Small Scale TCB      | 44°47'26"N      | 109°6'32"W       | Willwood Fm      | North               |
| 250°               | Small Scale TCB      | 44°47'26"N      | 109°6'32"W       | Willwood Fm      | North               |
| 200°               | Small Scale TCB      | 44°47'26"N      | 109°6'32"W       | Willwood Fm      | North               |
| 230°               | Large Scale TCB      | 44°47'26"N      | 109°6'32"W       | Willwood Fm      | North               |
| 280°               | Large Scale TCB      | 44°47'26"N      | 109°6'32"W       | Willwood Fm      | North               |
| 294°               | Small Scale TCB      | 44°47'12"N      | 109°6'28"W       | Willwood Fm      | North               |
| 298°               | Small Scale TCB      | 44°47'12"N      | 109°6'28"W       | Willwood Fm      | North               |
| 300°               | Large Scale TCB      | 44°47'12"N      | 109°6'28"W       | Willwood Fm      | North               |
| 245°               | Large Scale TCB      | 44°47'12"N      | 109°6'28"W       | Willwood Fm      | North               |
| 150°               | Large Scale TCB      | 44°48'53"N      | 109°2'59"W       | Willwood Fm      | North               |
| 130°               | Large Scale TCB      | 44°48'53"N      | 109°2'59"W       | Willwood Fm      | North               |
| 350°               | Large Scale TCB      | 44°48'53"N      | 109°2'59"W       | Willwood Fm      | North               |
| 345°               | Large Scale TCB      | 44°48'53"N      | 109°2'59"W       | Willwood Fm      | North               |
| 310°               | Small Scale TCB      | 44°48'53"N      | 109°2'59"W       | Willwood Fm      | North               |

|      |                 |            |             |               |           |
|------|-----------------|------------|-------------|---------------|-----------|
| 292° | Large Scale TCB | 44°14'50"N | 108°50'60"W | Fort Union Fm | West      |
| 318° | Large Scale TCB | 44°14'50"N | 108°50'60"W | Fort Union Fm | West      |
| 319° | Large Scale TCB | 44°16'6"N  | 108°47'26"W | Fort Union Fm | West      |
| 311° | Large Scale TCB | 44°16'6"N  | 108°47'26"W | Fort Union Fm | West      |
| 25°  | Large Scale TCB | 44°16'41"N | 108°46'37"W | Fort Union Fm | West      |
| 40°  | Large Scale TCB | 44°16'41"N | 108°46'37"W | Fort Union Fm | West      |
| 28°  | Large Scale TCB | 44°19'9"N  | 108°44'7"W  | Fort Union Fm | West      |
| 115° | Large Scale TCB | 44°19'9"N  | 108°44'7"W  | Fort Union Fm | West      |
| 14°  | Small Scale TCB | 44°19'9"N  | 108°44'7"W  | Fort Union Fm | West      |
| 44°  | Large Scale TCB | 44°19'11"N | 108°44'4"W  | Willwood Fm   | West      |
| 187° | Large Scale TCB | 44°19'11"N | 108°44'4"W  | Willwood Fm   | West      |
| 348° | Large Scale TCB | 44°19'11"N | 108°44'4"W  | Willwood Fm   | West      |
| 260° | Large Scale TCB | 44°19'26"N | 108°43'45"W | Willwood Fm   | West      |
| 375° | Large Scale TCB | 44°19'26"N | 108°43'45"W | Willwood Fm   | West      |
| 281° | Large Scale TCB | 44°19'26"N | 108°43'45"W | Willwood Fm   | West      |
| 30°  | Large Scale TCB | 44°19'26"N | 108°43'45"W | Willwood Fm   | West      |
| 90°  | Large Scale TCB | 44°19'39"N | 108°43'26"W | Willwood Fm   | West      |
| 320° | Large Scale TCB | 44°19'39"N | 108°43'26"W | Willwood Fm   | West      |
| 300° | Large Scale TCB | 44°19'39"N | 108°43'26"W | Willwood Fm   | West      |
| 320° | Large Scale TCB | 44°19'41"N | 108°43'26"W | Willwood Fm   | West      |
| 335° | Large Scale TCB | 44°19'41"N | 108°43'26"W | Willwood Fm   | West      |
| 45°  | Large Scale TCB | 44°19'41"N | 108°43'26"W | Willwood Fm   | West      |
| 82°  | Large Scale TCB | 44°19'56"N | 108°42'44"W | Willwood Fm   | West      |
| 293° | Large Scale TCB | 44°23'12"N | 108°37'15"W | Willwood Fm   | West      |
| 336° | Large Scale TCB | 44°23'12"N | 108°37'15"W | Willwood Fm   | West      |
| 3°   | Small Scale TCB | 44°23'12"N | 108°37'15"W | Willwood Fm   | West      |
| 278° | Large Scale TCB | 44°23'12"N | 108°37'15"W | Willwood Fm   | West      |
| 340° | Large Scale TCB | 44°23'12"N | 108°37'15"W | Willwood Fm   | West      |
| 337° | Large Scale TCB | 44°23'17"N | 108°37'21"W | Willwood Fm   | West      |
| 94°  | Large Scale TCB | 44°24'18"N | 108°34'29"W | Willwood Fm   | West      |
| 34°  | Small Scale TCB | 44°24'18"N | 108°34'29"W | Willwood Fm   | West      |
| 11°  | Small Scale TCB | 44°24'18"N | 108°34'29"W | Willwood Fm   | West      |
| 290° | Large Scale TCB | 44°24'19"N | 108°34'29"W | Willwood Fm   | West      |
| 137° | Large Scale TCB | 44°0'43"N  | 108°20'37"W | Willwood Fm   | Southwest |
| 61°  | Large Scale TCB | 44°0'43"N  | 108°20'37"W | Willwood Fm   | Southwest |
| 82°  | Small Scale TCB | 44°0'43"N  | 108°20'37"W | Willwood Fm   | Southwest |
| 192° | Large Scale TCB | 44°0'41"N  | 108°20'39"W | Willwood Fm   | Southwest |
| 285° | Large Scale TCB | 44°0'41"N  | 108°20'39"W | Willwood Fm   | Southwest |
| 315° | Large Scale TCB | 44°0'41"N  | 108°20'39"W | Willwood Fm   | Southwest |
| 283° | Large Scale TCB | 44°0'41"N  | 108°20'39"W | Willwood Fm   | Southwest |
| 115° | Large Scale TCB | 44°0'43"N  | 108°20'53"W | Willwood Fm   | Southwest |
| 129° | Large Scale TCB | 44°0'43"N  | 108°20'53"W | Willwood Fm   | Southwest |
| 290° | Large Scale TCB | 44°0'43"N  | 108°20'53"W | Willwood Fm   | Southwest |

|      |                 |            |             |               |           |
|------|-----------------|------------|-------------|---------------|-----------|
| 71°  | Small Scale TCB | 44°0'43"N  | 108°20'53"W | Willwood Fm   | Southwest |
| 31°  | Large Scale TCB | 44°1'4"N   | 108°21'7"W  | Willwood Fm   | Southwest |
| 54°  | Small Scale TCB | 44°1'4"N   | 108°21'7"W  | Willwood Fm   | Southwest |
| 55°  | Large Scale TCB | 44°1'6"N   | 108°21'6"W  | Willwood Fm   | Southwest |
| 11°  | Large Scale TCB | 44°1'6"N   | 108°21'6"W  | Willwood Fm   | Southwest |
| 136° | Large Scale TCB | 44°1'6"N   | 108°21'6"W  | Willwood Fm   | Southwest |
| 357° | Large Scale TCB | 44°1'6"N   | 108°21'6"W  | Willwood Fm   | Southwest |
| 359° | Large Scale TCB | 44°1'8"N   | 108°21'7"W  | Willwood Fm   | Southwest |
| 330° | Large Scale TCB | 44°0'39"N  | 108°23'31"W | Willwood Fm   | Southwest |
| 339° | Large Scale TCB | 44°0'39"N  | 108°23'31"W | Willwood Fm   | Southwest |
| 277° | Large Scale TCB | 44°0'39"N  | 108°23'31"W | Willwood Fm   | Southwest |
| 30°  | Large Scale TCB | 44°0'41"N  | 108°23'33"W | Willwood Fm   | Southwest |
| 260° | Large Scale TCB | 44°0'41"N  | 108°23'33"W | Willwood Fm   | Southwest |
| 314° | Large Scale TCB | 44°0'41"N  | 108°23'33"W | Willwood Fm   | Southwest |
| 34°  | Large Scale TCB | 44°0'36"N  | 108°24'59"W | Willwood Fm   | Southwest |
| 55°  | Large Scale TCB | 44°0'38"N  | 108°24'44"W | Willwood Fm   | Southwest |
| 173° | Large Scale TCB | 44°0'38"N  | 108°24'44"W | Willwood Fm   | Southwest |
| 29°  | Small Scale TCB | 44°0'38"N  | 108°24'44"W | Willwood Fm   | Southwest |
| 224° | Large Scale TCB | 44°0'38"N  | 108°24'44"W | Willwood Fm   | Southwest |
| 343° | Large Scale TCB | 44°0'38"N  | 108°24'44"W | Willwood Fm   | Southwest |
| 104° | Large Scale TCB | 44°0'38"N  | 108°24'44"W | Willwood Fm   | Southwest |
| 357° | Large Scale TCB | 44°0'32"N  | 108°26'54"W | Willwood Fm   | Southwest |
| 229° | Large Scale TCB | 44°0'35"N  | 108°27'8"W  | Willwood Fm   | Southwest |
| 42°  | Large Scale TCB | 44°0'35"N  | 108°27'8"W  | Willwood Fm   | Southwest |
| 103° | Large Scale TCB | 43°58'56"N | 108°34'35"W | Fort Union Fm | Southwest |
| 33°  | Large Scale TCB | 43°58'56"N | 108°34'35"W | Fort Union Fm | Southwest |
| 14°  | Small Scale TCB | 43°58'56"N | 108°34'35"W | Fort Union Fm | Southwest |
| 10°  | Large Scale TCB | 43°58'56"N | 108°34'37"W | Fort Union Fm | Southwest |
| 340° | Large Scale TCB | 43°58'56"N | 108°34'37"W | Fort Union Fm | Southwest |
| 71°  | Large Scale TCB | 43°58'58"N | 108°34'37"W | Fort Union Fm | Southwest |
| 64°  | Large Scale TCB | 43°58'58"N | 108°34'37"W | Fort Union Fm | Southwest |
| 68°  | Large Scale TCB | 43°58'58"N | 108°34'37"W | Fort Union Fm | Southwest |
| 16°  | Large Scale TCB | 43°58'58"N | 108°34'37"W | Fort Union Fm | Southwest |
| 334° | Large Scale TCB | 43°59'1"N  | 108°34'43"W | Fort Union Fm | Southwest |
| 10°  | Small Scale TCB | 44°1'5"N   | 107°45'6"W  | Willwood Fm   | Southeast |
| 133° | Small Scale TCB | 44°1'5"N   | 107°45'6"W  | Willwood Fm   | Southeast |
| 90°  | Large Scale TCB | 44°0'47"N  | 107°45'1"W  | Willwood Fm   | Southeast |
| 289° | Large Scale TCB | 44°0'19"N  | 107°44'55"W | Willwood Fm   | Southeast |
| 127° | Large Scale TCB | 44°0'19"N  | 107°44'55"W | Willwood Fm   | Southeast |
| 169° | Large Scale TCB | 44°0'19"N  | 107°44'55"W | Willwood Fm   | Southeast |
| 157° | Large Scale TCB | 44°0'19"N  | 107°44'55"W | Willwood Fm   | Southeast |
| 355° | Small Scale TCB | 44°2'56"N  | 107°50'40"W | Willwood Fm   | Southeast |
| 255° | Large Scale TCB | 44°2'56"N  | 107°50'40"W | Willwood Fm   | Southeast |

|      |                 |           |             |               |           |
|------|-----------------|-----------|-------------|---------------|-----------|
| 307° | Large Scale TCB | 44°5'54"N | 107°47'49"W | Willwood Fm   | Southeast |
| 322° | Large Scale TCB | 44°5'54"N | 107°47'49"W | Willwood Fm   | Southeast |
| 320° | Small Scale TCB | 44°5'54"N | 107°47'49"W | Willwood Fm   | Southeast |
| 322° | Large Scale TCB | 44°6'9"N  | 107°47'50"W | Fort Union Fm | Southeast |
| 30°  | Small Scale TCB | 44°6'9"N  | 107°47'50"W | Fort Union Fm | Southeast |
| 320° | Large Scale TCB | 44°6'9"N  | 107°47'50"W | Fort Union Fm | Southeast |
| 287° | Large Scale TCB | 44°6'9"N  | 107°47'50"W | Fort Union Fm | Southeast |
| 230° | Large Scale TCB | 44°6'9"N  | 107°47'50"W | Fort Union Fm | Southeast |
| 232° | Large Scale TCB | 44°6'9"N  | 107°47'50"W | Fort Union Fm | Southeast |
| 257° | Large Scale TCB | 44°6'9"N  | 107°47'50"W | Fort Union Fm | Southeast |
| 330° | Large Scale TCB | 44°6'9"N  | 107°47'50"W | Fort Union Fm | Southeast |
| 270° | Large Scale TCB | 44°6'9"N  | 107°47'50"W | Fort Union Fm | Southeast |
| 335° | Large Scale TCB | 44°4'49"N | 107°46'40"W | Fort Union Fm | Southeast |
| 358° | Large Scale TCB | 44°4'49"N | 107°46'40"W | Fort Union Fm | Southeast |
| 350° | Large Scale TCB | 44°4'49"N | 107°46'40"W | Fort Union Fm | Southeast |
| 260° | Large Scale TCB | 44°4'50"N | 107°46'38"W | Fort Union Fm | Southeast |
| 193° | Large Scale TCB | 44°4'48"N | 107°46'41"W | Fort Union Fm | Southeast |
| 240° | Large Scale TCB | 44°4'45"N | 107°46'39"W | Fort Union Fm | Southeast |
| 180° | Small Scale TCB | 44°4'45"N | 107°46'39"W | Fort Union Fm | Southeast |
| 330° | Large Scale TCB | 44°4'45"N | 107°46'39"W | Fort Union Fm | Southeast |
| 210° | Small Scale TCB | 44°4'44"N | 107°46'37"W | Fort Union Fm | Southeast |
| 170° | Large Scale TCB | 44°4'44"N | 107°46'37"W | Fort Union Fm | Southeast |
| 230° | Large Scale TCB | 44°4'44"N | 107°46'37"W | Fort Union Fm | Southeast |
| 298° | Large Scale TCB | 44°4'44"N | 107°46'37"W | Fort Union Fm | Southeast |
| 313° | Large Scale TCB | 44°4'44"N | 107°46'37"W | Fort Union Fm | Southeast |
| 306° | Large Scale TCB | 44°4'44"N | 107°46'37"W | Fort Union Fm | Southeast |
| 210° | Large Scale TCB | 44°4'44"N | 107°46'37"W | Fort Union Fm | Southeast |
| 219° | Large Scale TCB | 44°4'44"N | 107°46'37"W | Fort Union Fm | Southeast |
| 230° | Large Scale TCB | 44°4'41"N | 107°46'33"W | Fort Union Fm | Southeast |
| 130° | Large Scale TCB | 44°4'41"N | 107°46'33"W | Fort Union Fm | Southeast |
| 165° | Large Scale TCB | 44°4'39"N | 107°46'33"W | Fort Union Fm | Southeast |
| 129° | Small Scale TCB | 44°4'40"N | 107°46'27"W | Fort Union Fm | Southeast |
| 76°  | Large Scale TCB | 44°4'40"N | 107°46'27"W | Fort Union Fm | Southeast |
| 237° | Large Scale TCB | 44°4'40"N | 107°46'27"W | Fort Union Fm | Southeast |
| 322° | Large Scale TCB | 44°4'40"N | 107°46'27"W | Fort Union Fm | Southeast |
| 125° | Large Scale TCB | 44°4'14"N | 107°46'18"W | Fort Union Fm | Southeast |
| 344° | Large Scale TCB | 44°4'14"N | 107°46'18"W | Fort Union Fm | Southeast |
| 270° | Small Scale TCB | 44°4'14"N | 107°46'18"W | Fort Union Fm | Southeast |
| 357° | Large Scale TCB | 44°4'14"N | 107°46'18"W | Fort Union Fm | Southeast |
| 128° | Large Scale TCB | 44°4'14"N | 107°46'18"W | Fort Union Fm | Southeast |
| 260° | Large Scale TCB | 44°4'17"N | 107°46'17"W | Willwood Fm   | Southeast |
| 181° | Large Scale TCB | 44°4'17"N | 107°46'17"W | Willwood Fm   | Southeast |
| 321° | Large Scale TCB | 44°4'8"N  | 107°46'6"W  | Willwood Fm   | Southeast |

|      |                 |            |               |               |           |
|------|-----------------|------------|---------------|---------------|-----------|
| 323° | Large Scale TCB | 43°55'35"N | 108°3'51"W    | Willwood Fm   | Southeast |
| 265° | Large Scale TCB | 43°55'35"N | 108°3'51"W    | Willwood Fm   | Southeast |
| 354° | Small Scale TCB | 43°55'35"N | 108°3'51"W    | Willwood Fm   | Southeast |
| 347° | Large Scale TCB | 43°55'35"N | 108°3'51"W    | Willwood Fm   | Southeast |
| 285° | Large Scale TCB | 43°55'35"N | 108°3'51"W    | Willwood Fm   | Southeast |
| 350° | Large Scale TCB | 43°55'35"N | 108°3'51"W    | Willwood Fm   | Southeast |
| 349° | Large Scale TCB | 43°55'35"N | 108°3'51"W    | Willwood Fm   | Southeast |
| 346° | Large Scale TCB | 43°55'35"N | 108°3'51"W    | Willwood Fm   | Southeast |
| 313° | Large Scale TCB | 43°55'35"N | 108°3'51"W    | Willwood Fm   | Southeast |
| 73°  | Large Scale TCB | 43°55'35"N | 108°3'51"W    | Willwood Fm   | Southeast |
| 317° | Large Scale TCB | 43°56'13"N | 108°4'25"W    | Willwood Fm   | Southeast |
| 350° | Large Scale TCB | 43°57'19"N | 108°6'34"W    | Willwood Fm   | Southeast |
| 52°  | Large Scale TCB | 43°53'37"N | 107°59'23"W   | Fort Union Fm | Southeast |
| 105° | Large Scale TCB | 43°53'37"N | 107°59'23"W   | Fort Union Fm | Southeast |
| 81°  | Large Scale TCB | 43°53'37"N | 107°59'23"W   | Fort Union Fm | Southeast |
| 313° | Large Scale TCB | 43°53'37"N | 107°59'23"W   | Fort Union Fm | Southeast |
| 31°  | Large Scale TCB | 43°53'37"N | 107°59'23"W   | Fort Union Fm | Southeast |
| 31°  | Large Scale TCB | 43°53'37"N | 107°59'23"W   | Fort Union Fm | Southeast |
| 163° | Large Scale TCB | 43°53'37"N | 107°59'23"W   | Fort Union Fm | Southeast |
| 23°  | Large Scale TCB | 43°53'34"N | 107°59'29"W   | Fort Union Fm | Southeast |
| 119° | Large Scale TCB | 43°54'31"N | 107°58'45"W   | Fort Union Fm | Southeast |
| 316° | Large Scale TCB | 43°54'31"N | 107°58'45"W   | Fort Union Fm | Southeast |
| 320° | Large Scale TCB | 43°54'31"N | 107°58'45"W   | Fort Union Fm | Southeast |
| 219° | Large Scale TCB | 43°54'30"N | 107°58'45"W   | Fort Union Fm | Southeast |
| 10°  | Large Scale TCB | 44°6'59"N  | 108°10'52"W   | Willwood Fm   | Southeast |
| 25°  | Large Scale TCB | 44°6'59"N  | 108°10'52"W   | Willwood Fm   | Southeast |
| 330° | Small Scale TCB | 44°6'59"N  | 108°10'52"W   | Willwood Fm   | Southeast |
| 30°  | Large Scale TCB | 44°4'15"N  | 108°5'47"W    | Willwood Fm   | Southeast |
| 315° | Large Scale PCB | 44°4'15"N  | 108°5'47"W    | Willwood Fm   | Southeast |
| 90°  | Small Scale PCB | 44°6'49"N  | 108°10'53"W   | Willwood Fm   | Southeast |
| 223° | Small Scale PCB | 44°5'17"N  | 108°8'6"W     | Willwood Fm   | Southeast |
| 0°   | Small Scale PCB | 44°7'53"N  | 108°10'46"W   | Willwood Fm   | Southeast |
| 20°  | Large Scale PCB | 44°7'52"N  | 108°10'43"W   | Willwood Fm   | Southeast |
| 100° | Large Scale PCB | 44°6'33"N  | 108°50'59"W   | Willwood Fm   | Southwest |
| 140° | Small Scale PCB | 44°6'32"N  | 108°11'0.6"W  | Willwood Fm   | Southeast |
| 323° | Small Scale PCB | 44°6'34"N  | 108°11'5"W    | Willwood Fm   | Southeast |
| 107° | Small Scale TCB | 44°6'33"N  | 108°11'0.71"W | Willwood Fm   | Southeast |
| 325° | Small Scale PCB | 44°6'13"N  | 108°10'58"W   | Willwood Fm   | Southeast |
| 115° | Small Scale PCB | 44°6'13"N  | 108°10'57"W   | Willwood Fm   | Southeast |
| 337° | Small Scale PCB | 44°7'14"N  | 108°11'17"W   | Willwood Fm   | Southeast |
| 47°  | Small Scale PCB | 44°6'9"N   | 108°10'45"W   | Willwood Fm   | Southeast |
| 64°  | Large Scale PCB | 44°6'9"N   | 108°10'45"W   | Willwood Fm   | Southeast |
| 258° | Small Scale PCB | 44°6'9"N   | 108°10'45"W   | Willwood Fm   | Southeast |

|      |                 |           |             |               |           |
|------|-----------------|-----------|-------------|---------------|-----------|
| 100° | Large Scale TCB | 44°6'12"N | 108°10'56"W | Willwood Fm   | Southeast |
| 193° | Large Scale TCB | 44°6'12"N | 108°10'56"W | Willwood Fm   | Southeast |
| 59°  | Large Scale TCB | 44°0'56"N | 108°37'16"N | Fort Union Fm | Southwest |
| 19°  | Small Scale TCB | 44°0'56"N | 108°37'16"N | Fort Union Fm | Southwest |
