# Supplementary material
Source: publisher figshare collection journal article supplement (https://gsapubs.figshare.com/articles/dataset/_/19400963)
Supplement: Supplementary file 2 [file 1]

Supplemental Table 2. Point-count data.

| <i>Sample</i> | <i>Mono</i><br><i>Otz</i> | <i>Undulose</i><br><i>Otz</i> | <i>Poly</i><br><i>(Otzite)</i> | <i>Kspar</i> | <i>Plag</i> | <i>Sed</i><br><i>Lithic</i> | <i>Volc</i><br><i>Lithic</i> | <i>Mica</i> | <i>Chert</i> | <i>Magnetite</i> | <i>Chalcedony</i> | <i>Total</i><br><i>Counts</i> |
|---------------|---------------------------|-------------------------------|--------------------------------|--------------|-------------|-----------------------------|------------------------------|-------------|--------------|------------------|-------------------|-------------------------------|
| BHTi-1        | 190                       | 95                            | 3                              | 35           | 18          | 24                          | 39                           | 82          | 8            | 3                | 3                 | 500                           |
| BHTi-2        | 183                       | 111                           | 2                              | 36           | 31          | 36                          | 25                           | 70          | 1            | 3                | 2                 | 500                           |
| BHTi-3        | 206                       | 108                           | 7                              | 32           | 20          | 19                          | 27                           | 76          | 3            | 0                | 3                 | 501                           |
| BHTi-4        | 178                       | 85                            | 8                              | 64           | 41          | 15                          | 28                           | 73          | 8            | 0                | 0                 | 500                           |
| BHCF-1        | 192                       | 46                            | 6                              | 55           | 37          | 35                          | 23                           | 92          | 12           | 1                | 1                 | 500                           |
| BHCF-2        | 192                       | 72                            | 4                              | 41           | 33          | 47                          | 30                           | 50          | 23           | 7                | 1                 | 500                           |
| BHCF-3        | 177                       | 73                            | 9                              | 57           | 55          | 41                          | 28                           | 43          | 13           | 3                | 1                 | 500                           |
| BHCF-4        | 176                       | 55                            | 5                              | 49           | 69          | 33                          | 31                           | 56          | 20           | 2                | 4                 | 500                           |
| BHWm-1        | 174                       | 61                            | 7                              | 61           | 62          | 30                          | 36                           | 40          | 26           | 3                | 0                 | 500                           |
| BHWo-2        | 174                       | 62                            | 6                              | 60           | 59          | 16                          | 43                           | 55          | 21           | 3                | 1                 | 500                           |
| BHWo-3        | 167                       | 63                            | 19                             | 62           | 68          | 19                          | 31                           | 48          | 22           | 1                | 0                 | 500                           |
| BHWo-4        | 151                       | 74                            | 23                             | 71           | 62          | 17                          | 33                           | 45          | 22           | 2                | 0                 | 500                           |
| BHWo-5        | 153                       | 42                            | 6                              | 60           | 58          | 73                          | 28                           | 69          | 6            | 0                | 5                 | 500                           |
| BHWA-1        | 151                       | 75                            | 11                             | 43           | 63          | 32                          | 38                           | 63          | 20           | 1                | 3                 | 500                           |
| BHWA-2        | 152                       | 94                            | 11                             | 61           | 68          | 19                          | 41                           | 48          | 4            | 0                | 2                 | 500                           |
| BHWA-3        | 142                       | 89                            | 12                             | 65           | 70          | 16                          | 32                           | 56          | 14           | 2                | 2                 | 500                           |
| BHWA-4        | 148                       | 72                            | 10                             | 80           | 51          | 18                          | 30                           | 64          | 25           | 2                | 0                 | 500                           |
| MCPS-1        | 196                       | 110                           | 5                              | 10           | 27          | 41                          | 28                           | 69          | 7            | 3                | 4                 | 500                           |
| MCPS-2        | 134                       | 94                            | 9                              | 62           | 25          | 42                          | 35                           | 69          | 18           | 9                | 3                 | 500                           |
| MCPS-3        | 242                       | 95                            | 2                              | 10           | 16          | 59                          | 22                           | 42          | 5            | 7                | 0                 | 500                           |
| MCPS-4        | 143                       | 84                            | 10                             | 61           | 46          | 31                          | 32                           | 73          | 11           | 5                | 4                 | 500                           |
| MCPS-8        | 249                       | 112                           | 3                              | 10           | 11          | 39                          | 19                           | 50          | 2            | 3                | 2                 | 500                           |
| MCPS-16       | 208                       | 128                           | 6                              | 18           | 15          | 34                          | 21                           | 63          | 3            | 2                | 2                 | 500                           |
| MCPS-20       | 188                       | 143                           | 6                              | 37           | 19          | 30                          | 22                           | 47          | 5            | 3                | 0                 | 500                           |
| MCPS-21       | 185                       | 115                           | 6                              | 36           | 27          | 37                          | 24                           | 61          | 3            | 1                | 5                 | 500                           |
| MCPS-22       | 187                       | 148                           | 6                              | 16           | 17          | 50                          | 25                           | 38          | 6            | 4                | 3                 | 500                           |
| MCPS-27       | 198                       | 129                           | 8                              | 35           | 14          | 52                          | 24                           | 34          | 4            | 0                | 2                 | 500                           |
| MCPS-27       | 211                       | 131                           | 7                              | 29           | 11          | 48                          | 25                           | 30          | 7            | 0                | 1                 | 500                           |
| MCPS-37       | 121                       | 139                           | 9                              | 69           | 31          | 33                          | 36                           | 22          | 33           | 7                | 0                 | 500                           |
| MCPS-38       | 124                       | 149                           | 9                              | 61           | 22          | 22                          | 32                           | 57          | 11           | 11               | 2                 | 500                           |
| MCPS-39       | 168                       | 141                           | 6                              | 45           | 26          | 21                          | 21                           | 46          | 16           | 9                | 1                 | 500                           |
| MCPS-40       | 238                       | 123                           | 2                              | 20           | 8           | 36                          | 19                           | 44          | 4            | 4                | 2                 | 500                           |
| MCPS-44       | 181                       | 125                           | 5                              | 56           | 23          | 25                          | 34                           | 22          | 23           | 4                | 2                 | 500                           |
| MCPS-49       | 194                       | 141                           | 9                              | 32           | 16          | 35                          | 10                           | 55          | 4            | 1                | 3                 | 500                           |
| MCPS-50       | 237                       | 139                           | 3                              | 11           | 7           | 30                          | 27                           | 33          | 8            | 4                | 1                 | 500                           |
| MCPS-01       | 123                       | 145                           | 12                             | 57           | 36          | 31                          | 16                           | 19          | 51           | 4                | 6                 | 500                           |
| MCPS-02       | 176                       | 148                           | 13                             | 29           | 9           | 29                          | 11                           | 4           | 72           | 2                | 7                 | 500                           |
| WW-03         | 137                       | 111                           | 8                              | 65           | 62          | 25                          | 15                           | 25          | 50           | 4                | 0                 | 502                           |
| WW-05         | 122                       | 118                           | 10                             | 73           | 80          | 18                          | 15                           | 14          | 49           | 0                | 3                 | 502                           |
| WW-09         | 131                       | 131                           | 6                              | 67           | 60          | 26                          | 13                           | 13          | 50           | 1                | 3                 | 501                           |
| WW-10         | 185                       | 144                           | 7                              | 36           | 2           | 27                          | 3                            | 0           | 89           | 1                | 10                | 504                           |
| WW-15         | 204                       | 162                           | 3                              | 19           | 2           | 31                          | 15                           | 5           | 57           | 6                | 4                 | 508                           |
| WW-16         | 205                       | 175                           | 4                              | 23           | 1           | 12                          | 9                            | 11          | 48           | 4                | 8                 | 500                           |
| WW-18         | 174                       | 155                           | 3                              | 43           | 8           | 27                          | 22                           | 51          | 51           | 3                | 3                 | 540                           |
| WW-19         | 203                       | 137                           | 45                             | 20           | 2           | 30                          | 20                           | 1           | 63           | 16               | 6                 | 543                           |
| WW-20         | 153                       | 214                           | 3                              | 32           | 3           | 19                          | 21                           | 2           | 53           | 1                | 5                 | 506                           |
| WW-22         | 130                       | 143                           | 11                             | 48           | 14          | 28                          | 17                           | 6           | 96           | 1                | 12                | 506                           |
| WW-26         | 118                       | 201                           | 8                              | 23           | 28          | 18                          | 15                           | 2           | 87           | 0                | 5                 | 505                           |

|          |     |     |     |    |    |    |    |    |     |    |    |     |
|----------|-----|-----|-----|----|----|----|----|----|-----|----|----|-----|
| WW-27    | 147 | 161 | 10  | 41 | 10 | 12 | 10 | 2  | 103 | 0  | 14 | 510 |
| WW-29    | 175 | 154 | 4   | 22 | 10 | 30 | 24 | 30 | 46  | 1  | 7  | 503 |
| WW-30    | 205 | 167 | 4   | 18 | 5  | 8  | 8  | 6  | 68  | 3  | 8  | 500 |
| WW-33    | 223 | 167 | 4   | 5  | 5  | 13 | 12 | 20 | 44  | 9  | 2  | 504 |
| WW-36    | 145 | 130 | 6   | 65 | 3  | 26 | 10 | 2  | 105 | 0  | 9  | 501 |
| WW-38    | 197 | 173 | 2   | 25 | 11 | 19 | 18 | 2  | 51  | 1  | 3  | 502 |
| WW-39    | 108 | 191 | 5   | 82 | 5  | 37 | 5  | 3  | 63  | 1  | 2  | 502 |
| BS-01    | 138 | 117 | 5   | 60 | 70 | 23 | 17 | 23 | 41  | 3  | 3  | 500 |
| BS-02    | 125 | 122 | 10  | 65 | 74 | 28 | 7  | 19 | 50  | 1  | 4  | 505 |
| BsCm-01  | 134 | 120 | 6   | 69 | 82 | 15 | 23 | 29 | 26  | 1  | 0  | 505 |
| Fort-01  | 97  | 209 | 118 | 1  | 36 | 6  | 17 | 12 | 0   | 4  | 2  | 502 |
| Fort-02  | 59  | 236 | 140 | 3  | 14 | 2  | 25 | 15 | 1   | 5  | 4  | 504 |
| Fort-03  | 226 | 114 | 58  | 12 | 7  | 2  | 56 | 2  | 0   | 2  | 62 | 541 |
| Fort-04  | 115 | 177 | 70  | 2  | 63 | 2  | 48 | 5  | 0   | 6  | 20 | 508 |
| Fort-05  | 47  | 180 | 168 | 0  | 35 | 8  | 16 | 29 | 6   | 7  | 4  | 500 |
| Fort-07  | 67  | 145 | 144 | 1  | 46 | 6  | 38 | 21 | 7   | 14 | 15 | 504 |
| Fort-11  | 93  | 166 | 182 | 0  | 6  | 1  | 24 | 9  | 16  | 0  | 6  | 503 |
| Fort-13  | 72  | 189 | 157 | 8  | 27 | 3  | 21 | 14 | 4   | 6  | 4  | 505 |
| Fort-14  | 56  | 160 | 136 | 0  | 62 | 23 | 33 | 11 | 12  | 15 | 6  | 514 |
| Fort-16  | 46  | 176 | 130 | 3  | 54 | 29 | 42 | 12 | 11  | 8  | 2  | 513 |
| Fort-17  | 64  | 194 | 181 | 3  | 20 | 3  | 14 | 20 | 4   | 5  | 4  | 512 |
| Fort-18  | 69  | 173 | 158 | 4  | 38 | 14 | 12 | 19 | 3   | 7  | 4  | 501 |
| Fort-19  | 74  | 200 | 156 | 5  | 33 | 6  | 15 | 11 | 3   | 1  | 0  | 504 |
| Fort-20  | 59  | 191 | 168 | 4  | 29 | 4  | 28 | 10 | 3   | 2  | 15 | 513 |
| Fort-21  | 69  | 202 | 145 | 1  | 32 | 4  | 20 | 14 | 6   | 6  | 3  | 502 |
| BTC-01   | 29  | 232 | 169 | 1  | 1  | 1  | 62 | 2  | 0   | 0  | 5  | 502 |
| BTC-02   | 16  | 125 | 140 | 8  | 77 | 91 | 23 | 5  | 29  | 0  | 0  | 514 |
| Lance-01 | 64  | 120 | 213 | 0  | 49 | 8  | 27 | 14 | 2   | 5  | 3  | 505 |
| Lance-02 | 45  | 165 | 158 | 1  | 57 | 19 | 31 | 5  | 16  | 5  | 2  | 504 |
